# Supplementary material for: Sensitivity of 21st century simulated ecosystem indicators to model parameters, prescribed climate drivers, RCP scenarios and forest management actions for two Finnish boreal forest sites
Source: Copernicus journal article supplement (doi:10.5194/bg-17-2681-2020), 2020-05-18
Supplement: Supplementary file 1 [file bg-17-2681-2020-supplement.zip]

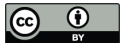

## *Supplement of*

# **Sensitivity of 21st century simulated ecosystem indicators to model parameters, prescribed climate drivers, RCP scenarios and forest management actions for two Finnish boreal forest sites**

**Jarmo Mäkelä et al.**

*Correspondence to:* Jarmo Mäkelä ([jarmo.makela@fmi.fi](mailto:jarmo.makela@fmi.fi)) and Francesco Minunno ([francesco.minunno@helsinki.fi](mailto:francesco.minunno@helsinki.fi))

- [bg-17-2681-2020-supplement-title-page.pdf](#)
- [JSBACH-indicators.txt](#)
- [JSBACH-indicators\\_header.txt](#)
- [PREBASout.csv](#)
- [TableCCAresults.xlsx](#)

The copyright of individual parts of the supplement might differ from the CC BY 4.0 License.
