# Supplementary material for: Sensitivity of 21st century simulated ecosystem indicators to model parameters, prescribed climate drivers, RCP scenarios and forest management actions for two Finnish boreal forest sites
Source: Copernicus journal article supplement (doi:10.5194/bg-17-2681-2020), 2020-05-18
Supplement: Supplementary file 1 [file TableCCAresults.xlsx]

## Sheet: Sheet1
				Figure 1											Figure 2							Figure 2
															PREBAS							JSBACH
				factors	period	rdindx	site	model							factors	period	rdindx	site	model	Group		factors	period	rdindx	site	model	Group
				rcp	1981/2010	0.261741	Hyy	PREBAS							rcp	1981/2010	0.0225787	Hyy	PREBAS	Carbon		par	1981/2010	0.00484024	Hyy	JSBACH	Carbon
				clim	1981/2010	0.656941	Hyy	PREBAS							clim	1981/2010	0.00304735	Hyy	PREBAS	Carbon		clim	1981/2010	0.362078	Hyy	JSBACH	Carbon
				par	1981/2010	0.121145	Hyy	PREBAS							par	1981/2010	0.0029794	Hyy	PREBAS	Carbon		rcp	1981/2010	0.104495	Hyy	JSBACH	Carbon
				man	1981/2010	0.979044	Hyy	PREBAS							man	1981/2010	0.843236	Hyy	PREBAS	Carbon		par	2011/2040	0.00967671	Hyy	JSBACH	Carbon
				rcp	2011/2040	0.310381	Hyy	PREBAS							rcp	2011/2040	0.0106995	Hyy	PREBAS	Carbon		clim	2011/2040	0.611236	Hyy	JSBACH	Carbon
				clim	2011/2040	0.597972	Hyy	PREBAS							clim	2011/2040	0.0042149	Hyy	PREBAS	Carbon		rcp	2011/2040	0.167601	Hyy	JSBACH	Carbon
				par	2011/2040	0.0825355	Hyy	PREBAS							par	2011/2040	0.00178919	Hyy	PREBAS	Carbon		par	2041/2070	0.00769039	Hyy	JSBACH	Carbon
				man	2011/2040	0.971239	Hyy	PREBAS							man	2011/2040	0.815988	Hyy	PREBAS	Carbon		clim	2041/2070	0.279761	Hyy	JSBACH	Carbon
				rcp	2041/2070	0.953631	Hyy	PREBAS							rcp	2041/2070	0.554254	Hyy	PREBAS	Carbon		rcp	2041/2070	0.433956	Hyy	JSBACH	Carbon
				clim	2041/2070	0.34717	Hyy	PREBAS							clim	2041/2070	0.00503236	Hyy	PREBAS	Carbon		par	2071/2100	0.00581148	Hyy	JSBACH	Carbon
				par	2041/2070	0.111952	Hyy	PREBAS							par	2041/2070	0.00767346	Hyy	PREBAS	Carbon		clim	2071/2100	0.06398	Hyy	JSBACH	Carbon
				man	2041/2070	0.973196	Hyy	PREBAS							man	2041/2070	0.87343	Hyy	PREBAS	Carbon		rcp	2071/2100	0.82764	Hyy	JSBACH	Carbon
				rcp	2071/2100	0.953182	Hyy	PREBAS							rcp	2071/2100	0.702592	Hyy	PREBAS	Carbon		par	1981/2010	0.00203681	Sod	JSBACH	Carbon
				clim	2071/2100	0.700647	Hyy	PREBAS							clim	2071/2100	0.00584302	Hyy	PREBAS	Carbon		clim	1981/2010	0.00104575	Sod	JSBACH	Carbon
				par	2071/2100	0.095204	Hyy	PREBAS							par	2071/2100	0.00214085	Hyy	PREBAS	Carbon		rcp	1981/2010	0.00020723	Sod	JSBACH	Carbon
				man	2071/2100	0.946787	Hyy	PREBAS							man	2071/2100	0.638763	Hyy	PREBAS	Carbon		par	2011/2040	0.00193758	Sod	JSBACH	Carbon
				rcp	1981/2010	0.28135	Sod	PREBAS							rcp	1981/2010	0.0702951	Sod	PREBAS	Carbon		clim	2011/2040	0.0105456	Sod	JSBACH	Carbon
				clim	1981/2010	0.533722	Sod	PREBAS							clim	1981/2010	0.0268261	Sod	PREBAS	Carbon		rcp	2011/2040	0.0188127	Sod	JSBACH	Carbon
				par	1981/2010	0.0830529	Sod	PREBAS							par	1981/2010	0.0240466	Sod	PREBAS	Carbon		par	2041/2070	0.00802958	Sod	JSBACH	Carbon
				man	1981/2010	0.596028	Sod	PREBAS							man	1981/2010	0.0521575	Sod	PREBAS	Carbon		clim	2041/2070	0.0188721	Sod	JSBACH	Carbon
				rcp	2011/2040	0.293967	Sod	PREBAS							rcp	2011/2040	0.0776912	Sod	PREBAS	Carbon		rcp	2041/2070	0.158684	Sod	JSBACH	Carbon
				clim	2011/2040	0.496312	Sod	PREBAS							clim	2011/2040	0.0540288	Sod	PREBAS	Carbon		par	2071/2100	0.0102268	Sod	JSBACH	Carbon
				par	2011/2040	0.0837653	Sod	PREBAS							par	2011/2040	0.015044	Sod	PREBAS	Carbon		clim	2071/2100	0.030432	Sod	JSBACH	Carbon
				man	2011/2040	0.222893	Sod	PREBAS							man	2011/2040	0.0446676	Sod	PREBAS	Carbon		rcp	2071/2100	0.682673	Sod	JSBACH	Carbon
				rcp	2041/2070	0.977102	Sod	PREBAS							rcp	2041/2070	0.72984	Sod	PREBAS	Carbon		par	1981/2010	0.00535255	Hyy	JSBACH	Water
				clim	2041/2070	0.771269	Sod	PREBAS							clim	2041/2070	0.0606925	Sod	PREBAS	Carbon		clim	1981/2010	0.0402014	Hyy	JSBACH	Water
				par	2041/2070	0.0689292	Sod	PREBAS							par	2041/2070	0.012142	Sod	PREBAS	Carbon		rcp	1981/2010	0.0034022	Hyy	JSBACH	Water
				man	2041/2070	0.403409	Sod	PREBAS							man	2041/2070	0.0458157	Sod	PREBAS	Carbon		par	2011/2040	0.00261582	Hyy	JSBACH	Water
				rcp	2071/2100	0.979293	Sod	PREBAS							rcp	2071/2100	0.886158	Sod	PREBAS	Carbon		clim	2011/2040	0.0115208	Hyy	JSBACH	Water
				clim	2071/2100	0.687611	Sod	PREBAS							clim	2071/2100	0.0220826	Sod	PREBAS	Carbon		rcp	2011/2040	0.000647489	Hyy	JSBACH	Water
				par	2071/2100	0.0612906	Sod	PREBAS							par	2071/2100	0.00964145	Sod	PREBAS	Carbon		par	2041/2070	0.00224469	Hyy	JSBACH	Water
				man	2071/2100	0.478595	Sod	PREBAS							man	2071/2100	0.160341	Sod	PREBAS	Carbon		clim	2041/2070	0.0133885	Hyy	JSBACH	Water
				par	1981/2010	0.0420799	Hyy	JSBACH							rcp	1981/2010	0.160212	Hyy	PREBAS	Water		rcp	2041/2070	0.00015644	Hyy	JSBACH	Water
				clim	1981/2010	0.867852	Hyy	JSBACH							clim	1981/2010	0.0339853	Hyy	PREBAS	Water		par	2071/2100	0.00162462	Hyy	JSBACH	Water
				rcp	1981/2010	0.284414	Hyy	JSBACH							par	1981/2010	0.00307094	Hyy	PREBAS	Water		clim	2071/2100	0.00749912	Hyy	JSBACH	Water
				par	2011/2040	0.0198361	Hyy	JSBACH							man	1981/2010	0.392944	Hyy	PREBAS	Water		rcp	2071/2100	0.00560405	Hyy	JSBACH	Water
				clim	2011/2040	0.841081	Hyy	JSBACH							rcp	2011/2040	0.00900396	Hyy	PREBAS	Water		par	1981/2010	0.001124	Sod	JSBACH	Water
				rcp	2011/2040	0.498402	Hyy	JSBACH							clim	2011/2040	0.0544114	Hyy	PREBAS	Water		clim	1981/2010	0.000522761	Sod	JSBACH	Water
				par	2041/2070	0.0305646	Hyy	JSBACH							par	2011/2040	0.000243197	Hyy	PREBAS	Water		rcp	1981/2010	8.51021e-06	Sod	JSBACH	Water
				clim	2041/2070	0.856642	Hyy	JSBACH							man	2011/2040	0.0289024	Hyy	PREBAS	Water		par	2011/2040	0.00106628	Sod	JSBACH	Water
				rcp	2041/2070	0.867938	Hyy	JSBACH							rcp	2041/2070	0.0428318	Hyy	PREBAS	Water		clim	2011/2040	0.0146508	Sod	JSBACH	Water
				par	2071/2100	0.0350454	Hyy	JSBACH							clim	2041/2070	0.0894996	Hyy	PREBAS	Water		rcp	2011/2040	0.000182208	Sod	JSBACH	Water
				clim	2071/2100	0.739856	Hyy	JSBACH							par	2041/2070	0.000126958	Hyy	PREBAS	Water		par	2041/2070	0.0022993	Sod	JSBACH	Water
				rcp	2071/2100	0.943165	Hyy	JSBACH							man	2041/2070	0.0368948	Hyy	PREBAS	Water		clim	2041/2070	0.0268644	Sod	JSBACH	Water
				par	1981/2010	0.0150931	Sod	JSBACH							rcp	2071/2100	0.053737	Hyy	PREBAS	Water		rcp	2041/2070	0.00113689	Sod	JSBACH	Water
				clim	1981/2010	0.84841	Sod	JSBACH							clim	2071/2100	0.0905515	Hyy	PREBAS	Water		par	2071/2100	0.00193089	Sod	JSBACH	Water
				rcp	1981/2010	0.0300156	Sod	JSBACH							par	2071/2100	0.000230279	Hyy	PREBAS	Water		clim	2071/2100	0.0118549	Sod	JSBACH	Water
				par	2011/2040	0.0116889	Sod	JSBACH							man	2071/2100	0.0392286	Hyy	PREBAS	Water		rcp	2071/2100	0.0012574	Sod	JSBACH	Water
				clim	2011/2040	0.749486	Sod	JSBACH							rcp	1981/2010	0.0449221	Sod	PREBAS	Water		par	1981/2010	0.00193082	Hyy	JSBACH	Gseason
				rcp	2011/2040	0.454477	Sod	JSBACH							clim	1981/2010	0.15177	Sod	PREBAS	Water		clim	1981/2010	0.259933	Hyy	JSBACH	Gseason
				par	2041/2070	0.0222904	Sod	JSBACH							par	1981/2010	0.000167259	Sod	PREBAS	Water		rcp	1981/2010	0.0149648	Hyy	JSBACH	Gseason
				clim	2041/2070	0.705152	Sod	JSBACH							man	1981/2010	6.28897e-08	Sod	PREBAS	Water		par	2011/2040	0.00155155	Hyy	JSBACH	Gseason
				rcp	2041/2070	0.586111	Sod	JSBACH							rcp	2011/2040	0.0027731	Sod	PREBAS	Water		clim	2011/2040	0.0586914	Hyy	JSBACH	Gseason
				par	2071/2100	0.0231635	Sod	JSBACH							clim	2011/2040	0.22905	Sod	PREBAS	Water		rcp	2011/2040	0.048003	Hyy	JSBACH	Gseason
				clim	2071/2100	0.851134	Sod	JSBACH							par	2011/2040	0.000709982	Sod	PREBAS	Water		par	2041/2070	0.00739478	Hyy	JSBACH	Gseason
				rcp	2071/2100	0.929347	Sod	JSBACH							man	2011/2040	2.46523e-06	Sod	PREBAS	Water		clim	2041/2070	0.0345008	Hyy	JSBACH	Gseason
															rcp	2041/2070	0.214827	Sod	PREBAS	Water		rcp	2041/2070	0.269125	Hyy	JSBACH	Gseason
															clim	2041/2070	0.192555	Sod	PREBAS	Water		par	2071/2100	0.0136915	Hyy	JSBACH	Gseason
															par	2041/2070	0.000431707	Sod	PREBAS	Water		clim	2071/2100	0.388938	Hyy	JSBACH	Gseason
															man	2041/2070	5.03258e-05	Sod	PREBAS	Water		rcp	2071/2100	0.405878	Hyy	JSBACH	Gseason
															rcp	2071/2100	0.235185	Sod	PREBAS	Water		par	1981/2010	8.72913e-05	Sod	JSBACH	Gseason
															clim	2071/2100	0.0994806	Sod	PREBAS	Water		clim	1981/2010	0.000881824	Sod	JSBACH	Gseason
															par	2071/2100	0.000348483	Sod	PREBAS	Water		rcp	1981/2010	1.52021e-05	Sod	JSBACH	Gseason
															man	2071/2100	0.000979483	Sod	PREBAS	Water		par	2011/2040	0.00333103	Sod	JSBACH	Gseason
															rcp	1981/2010	0.00340158	Hyy	PREBAS	Growth		clim	2011/2040	0.435093	Sod	JSBACH	Gseason
															clim	1981/2010	0.0268603	Hyy	PREBAS	Growth		rcp	2011/2040	0.0273596	Sod	JSBACH	Gseason
															par	1981/2010	0.0994934	Hyy	PREBAS	Growth		par	2041/2070	0.00723791	Sod	JSBACH	Gseason
															man	1981/2010	0.97098	Hyy	PREBAS	Growth		clim	2041/2070	0.427151	Sod	JSBACH	Gseason
															rcp	2011/2040	0.0177495	Hyy	PREBAS	Growth		rcp	2041/2070	0.0301746	Sod	JSBACH	Gseason
															clim	2011/2040	0.0433056	Hyy	PREBAS	Growth		par	2071/2100	0.00384962	Sod	JSBACH	Gseason
															par	2011/2040	0.0660366	Hyy	PREBAS	Growth		clim	2071/2100	0.218428	Sod	JSBACH	Gseason
															man	2011/2040	0.948637	Hyy	PREBAS	Growth		rcp	2071/2100	0.46275	Sod	JSBACH	Gseason
															rcp	2041/2070	0.551658	Hyy	PREBAS	Growth		par	1981/2010	0.00124631		JSBACH	Snow
															clim	2041/2070	0.0023002	Hyy	PREBAS	Growth		clim	1981/2010	0.772917		JSBACH	Snow
															par	2041/2070	0.0783711	Hyy	PREBAS	Growth		rcp	1981/2010	0.00645957		JSBACH	Snow
															man	2041/2070	0.968088	Hyy	PREBAS	Growth		par	2011/2040	0.000176611		JSBACH	Snow
															rcp	2071/2100	0.773827	Hyy	PREBAS	Growth		clim	2011/2040	0.662273		JSBACH	Snow
															clim	2071/2100	0.00124526	Hyy	PREBAS	Growth		rcp	2011/2040	0.0221825		JSBACH	Snow
															par	2071/2100	0.0737842	Hyy	PREBAS	Growth		par	2041/2070	0.000793604		JSBACH	Snow
															man	2071/2100	0.923763	Hyy	PREBAS	Growth		clim	2041/2070	0.560417		JSBACH	Snow
															rcp	1981/2010	0.00186708	Sod	PREBAS	Growth		rcp	2041/2070	0.341745		JSBACH	Snow
															clim	1981/2010	0.0180344	Sod	PREBAS	Growth		par	2071/2100	0.000824947		JSBACH	Snow
															par	1981/2010	0.0671868	Sod	PREBAS	Growth		clim	2071/2100	0.307387		JSBACH	Snow
															man	1981/2010	0.520083	Sod	PREBAS	Growth		rcp	2071/2100	0.65502		JSBACH	Snow
															rcp	2011/2040	0.0550248	Sod	PREBAS	Growth		par	1981/2010	0.00156585		JSBACH	Snow
															clim	2011/2040	0.0101728	Sod	PREBAS	Growth		clim	1981/2010	0.763169		JSBACH	Snow
															par	2011/2040	0.069477	Sod	PREBAS	Growth		rcp	1981/2010	0.0205627		JSBACH	Snow
															man	2011/2040	0.0142213	Sod	PREBAS	Growth		par	2011/2040	0.00104423		JSBACH	Snow
															rcp	2041/2070	0.77192	Sod	PREBAS	Growth		clim	2011/2040	0.267381		JSBACH	Snow
															clim	2041/2070	0.0684238	Sod	PREBAS	Growth		rcp	2011/2040	0.153277		JSBACH	Snow
															par	2041/2070	0.0430484	Sod	PREBAS	Growth		par	2041/2070	0.00231497		JSBACH	Snow
															man	2041/2070	0.24875	Sod	PREBAS	Growth		clim	2041/2070	0.301078		JSBACH	Snow
															rcp	2071/2100	0.883332	Sod	PREBAS	Growth		rcp	2041/2070	0.287961		JSBACH	Snow
															clim	2071/2100	0.0131865	Sod	PREBAS	Growth		par	2071/2100	0.001902		JSBACH	Snow
															par	2071/2100	0.0386777	Sod	PREBAS	Growth		clim	2071/2100	0.36907		JSBACH	Snow
															man	2071/2100	0.236835	Sod	PREBAS	Growth		rcp	2071/2100	0.808139		JSBACH	Snow
															rcp	1981/2010	0.0300105	Hyy	PREBAS	Gseason
															clim	1981/2010	0.233735	Hyy	PREBAS	Gseason
															par	1981/2010	3.55545e-06	Hyy	PREBAS	Gseason
															man	1981/2010	0.010881	Hyy	PREBAS	Gseason
															rcp	2011/2040	0.0135757	Hyy	PREBAS	Gseason
															clim	2011/2040	0.0874068	Hyy	PREBAS	Gseason
															par	2011/2040	8.46855e-10	Hyy	PREBAS	Gseason
															man	2011/2040	4.46623e-06	Hyy	PREBAS	Gseason
															rcp	2041/2070	0.27046	Hyy	PREBAS	Gseason
															clim	2041/2070	0.040502	Hyy	PREBAS	Gseason
															par	2041/2070	2.45452e-07	Hyy	PREBAS	Gseason
															man	2041/2070	7.54264e-05	Hyy	PREBAS	Gseason
															rcp	2071/2100	0.515747	Hyy	PREBAS	Gseason
															clim	2071/2100	0.407633	Hyy	PREBAS	Gseason
															par	2071/2100	1.29667e-07	Hyy	PREBAS	Gseason
															man	2071/2100	0.00013359	Hyy	PREBAS	Gseason
															rcp	1981/2010	0.0124925	Sod	PREBAS	Gseason
															clim	1981/2010	0.0034279	Sod	PREBAS	Gseason
															par	1981/2010	2.26034e-11	Sod	PREBAS	Gseason
															man	1981/2010	1.19249e-08	Sod	PREBAS	Gseason
															rcp	2011/2040	0.0113115	Sod	PREBAS	Gseason
															clim	2011/2040	0.0800843	Sod	PREBAS	Gseason
															par	2011/2040	3.60935e-11	Sod	PREBAS	Gseason
															man	2011/2040	3.03242e-08	Sod	PREBAS	Gseason
															rcp	2041/2070	0.231065	Sod	PREBAS	Gseason
															clim	2041/2070	0.140449	Sod	PREBAS	Gseason
															par	2041/2070	1.09834e-08	Sod	PREBAS	Gseason
															man	2041/2070	2.46771e-06	Sod	PREBAS	Gseason
															rcp	2071/2100	0.558795	Sod	PREBAS	Gseason
															clim	2071/2100	0.341467	Sod	PREBAS	Gseason
															par	2071/2100	1.98187e-07	Sod	PREBAS	Gseason
															man	2071/2100	7.48213e-06	Sod	PREBAS	Gseason
